# Supplementary material
Source: Springer Nature journal article supplement (https://www.springermedizin.de/resource/supplementary/12889_2014_6808_MOESM2_ESM.pdf/9499038)

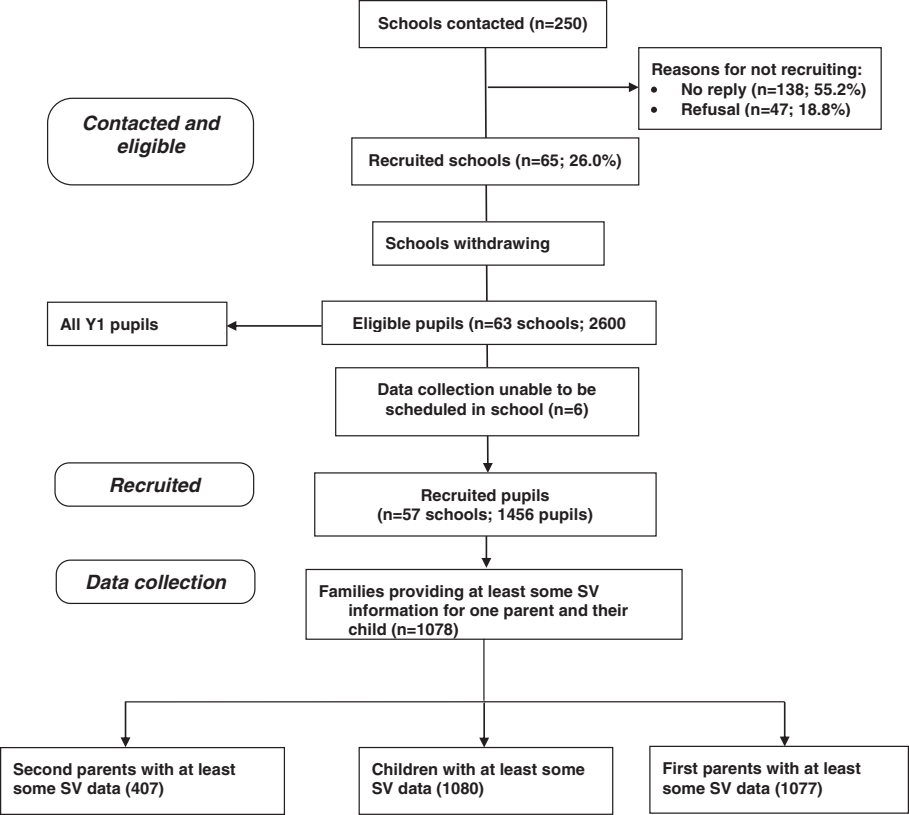

Supplement: MOESM2 [file 9499038]
